# Supplementary material for: Differential MicroRNA Expression Profile in Myxomatous Mitral Valve Prolapse and Fibroelastic Deficiency Valves
Source: PubMed Central journal article supplement (PMC4881574; doi:10.3390/ijms17050753), 2016-05-18
Supplement: ijms-17-00753-s001.pdf [file ijms-17-00753-s001.pdf]

## Supplementary Materials: Differential MicroRNA Expression Profile in Myxomatous Mitral Valve Prolapse and Fibroelastic Deficiency Valves

Yei-Tsung Chen, Juan Wang, Abby S.Y. Wee, Quek-Wei Yong, Edgar Lik-Wui Tay, Chin Cheng Woo, Vitaly Sorokin, Arthur Mark Richards and Lieng-Hsi Ling

**Table S1.** Detailed characterization of individual patients with myxomatous mitral valve prolapse (MMVP) and fibroelastic deficiency (FED).

| Case   | Prolapsed Segment(s) | Flail Segment | Segment with Ruptured Chord | Myxomatous, or Redundant Mitral Leaflets | AML Length, mm | AML Thickness, mm | PML Length, mm | PML Thickness, mm |
|--------|----------------------|---------------|-----------------------------|------------------------------------------|----------------|-------------------|----------------|-------------------|
| MMVP1  | A2 A3 P1 P2 P3       | P2            | P2                          | yes                                      | 30             | 4                 | 24             | 4.8               |
| MMVP2  | A2 A3 P1 P2 P3       | none          | none                        | yes                                      | 30             | 4                 | 13             | 1.8               |
| MMVP3  | A1 A2 A3 P3          | none          | none                        | yes                                      | 46             | 6                 | 16             | 6                 |
| MMVP4  | none                 | P1 P2         | P2                          | yes                                      | 29             | 5                 | 23             | 6                 |
| MMVP5  | A2 A3 P2 P3          | none          | none                        | yes                                      | 31             | 5.1               | 20             | 4.8               |
| MMVP6  | P2                   | none          | none                        | yes                                      | 32             | 3.3               | 26             | 3.6               |
| MMVP7  | A2 A3 P1 P2 P3       | none          | none                        | yes                                      | 33             | 6.8               | 22             | 4                 |
| MMVP8  | A2 A3                | none          | none                        | yes                                      | 34             | 5.5               | 14             | 5                 |
| MMVP9  | P3 A3 A2             | P2            | P2                          | yes                                      | 28             | 4.6               | 31             | 5.2               |
| MMVP10 | P1 P2 P3 A2 A3       | none          | no                          | yes                                      | 26             | 2.5               | 22             | 3.7               |
| FED1   | none                 | P3            | P3                          | no                                       | 28             | 2.9               | 16             | 3.2               |
| FED2   | P3                   | P2            | P2                          | no                                       | 22             | 2.7               | 17             | 1.9               |
| FED3   | A2                   | P2            | none                        | no                                       | 26             | 3.1               | 22             | 5                 |
| FED4   | none                 | P2            | P2                          | no                                       | 23             | 3.1               | 19             | 3.1               |
| FED5   | P2                   | P3            | P3                          | no                                       | -              | -                 | -              | -                 |
| FED6   | none                 | P2            | P2                          | no                                       | 19             | 2.7               | 20             | 4                 |
| FED7   | P3                   | P2            | P2                          | no                                       | 20             | 2.5               | 16             | 4.7               |
| FED8   | none                 | C2            | C2                          | no                                       | 26             | 3.6               | 17             | 3.6               |
| FED9   | A3 P3                | A2            | A2                          | no                                       | 24             | 2.6               | 10             | 1.4               |
| FED10  | none                 | P2            | P2                          | no                                       | 23             | 2.5               | 27             | 5.1               |

A (1, 2 or 3), anterior leaflet segment affected, AML, anterior mitral leaflet; P (1, 2 or 3), posterior leaflet scallop; PML, posterior mitral leaflet. For patient FED5, leaflet measurements were omitted as the original echocardiogram was no longer available.

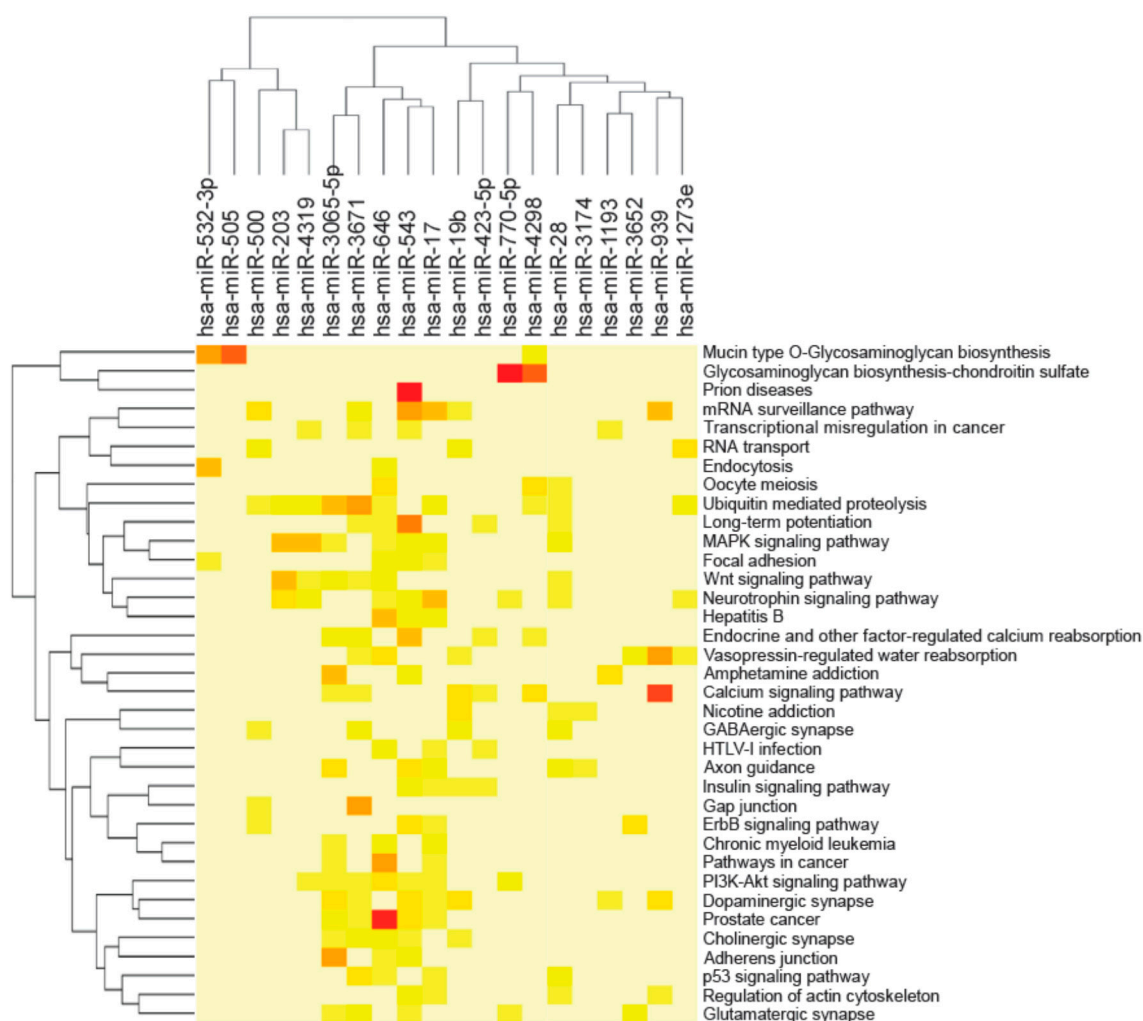

**Figure S1.** Heat map of microRNAs versus predicted pathways. Hierarchical clustering of predicted pathway and microRNAs that differentially expressed in MMVP and FED cohorts. The darker color clocks represent lower *p* values (cut-off, *p* < 0.05; Fisher’s method).

**Table S2.** The Kyoto Encyclopedia of Genes and Genomes (KEGG) Pathway predication.

| KEGG Pathway (Pathway Union)                       | <i>p</i> -Value        | #Genes | #miRNAs |
|----------------------------------------------------|------------------------|--------|---------|
| Ubiquitin mediated proteolysis                     | $2.15 \times 10^{-12}$ | 59     | 10      |
| Transcriptional misregulation in cancer            | $3.27 \times 10^{-12}$ | 53     | 6       |
| MAPK signaling pathway                             | $4.05 \times 10^{-10}$ | 69     | 7       |
| Neurotrophin signaling pathway                     | $1.54 \times 10^{-9}$  | 36     | 8       |
| Dopaminergic synapse                               | $3.15 \times 10^{-8}$  | 46     | 7       |
| Calcium signaling pathway                          | $8.13 \times 10^{-8}$  | 53     | 6       |
| Prostate cancer                                    | $1.24 \times 10^{-7}$  | 35     | 5       |
| Wnt signaling pathway                              | $4.08 \times 10^{-7}$  | 41     | 6       |
| Glycosaminoglycan biosynthesis—chondroitin sulfate | $1.60 \times 10^{-6}$  | 2      | 2       |
| Long-term potentiation                             | $5.18 \times 10^{-6}$  | 25     | 5       |
| Mucin type O-Glycan biosynthesis                   | $1.08 \times 10^{-5}$  | 5      | 3       |
| Vasopressin-regulated water reabsorption           | $4.82 \times 10^{-5}$  | 14     | 6       |
| PI3K-Akt signaling pathway                         | 0.0001                 | 99     | 7       |
| Axon guidance                                      | 0.0001                 | 37     | 5       |
| Amphetamine addiction                              | 0.0003                 | 22     | 3       |

Table S2. Cont.

| KEGG Pathway (Pathway Union)                              | p-Value                | #Genes | #miRNAs |
|-----------------------------------------------------------|------------------------|--------|---------|
| Glutamatergic synapse                                     | 0.0004                 | 34     | 5       |
| Prion diseases                                            | 0.0004                 | 3      | 1       |
| ErbB signaling pathway                                    | 0.0007                 | 24     | 4       |
| Endocrine and other factor-regulated calcium reabsorption | 0.0007                 | 18     | 5       |
| Regulation of actin cytoskeleton                          | 0.0013                 | 44     | 4       |
| Focal adhesion                                            | 0.0017                 | 43     | 4       |
| Gap junction                                              | 0.0023                 | 16     | 2       |
| Hepatitis B                                               | 0.0024                 | 32     | 3       |
| Oocyte meiosis                                            | 0.0044                 | 17     | 3       |
| Endocytosis                                               | 0.0052                 | 24     | 2       |
| Insulin signaling pathway                                 | 0.0059                 | 27     | 4       |
| RNA transport                                             | 0.0101                 | 15     | 3       |
| mRNA surveillance pathway                                 | 0.0125                 | 25     | 4       |
| GABAergic synapse                                         | 0.0142                 | 18     | 4       |
| Cholinergic synapse                                       | 0.0170                 | 30     | 5       |
| Nicotine addiction                                        | 0.0196                 | 6      | 3       |
| p53 signaling pathway                                     | 0.0229                 | 18     | 4       |
| Pathways in cancer                                        | 0.0251                 | 53     | 3       |
| HTLV-I infection                                          | 0.0328                 | 33     | 3       |
| Adherens junction                                         | 0.0342                 | 25     | 3       |
| Chronic myeloid leukemia                                  | 0.0493                 | 14     | 3       |
| <b>KEGG Pathway (Gene Union)</b>                          |                        |        |         |
| Ubiquitin mediated proteolysis                            | $1.48 \times 10^{-23}$ | 65     | 18      |
| Prostate cancer                                           | $1.19 \times 10^{-16}$ | 42     | 16      |
| Calcium signaling pathway                                 | $8.66 \times 10^{-16}$ | 75     | 18      |
| ErbB signaling pathway                                    | $1.96 \times 10^{-15}$ | 41     | 17      |
| Transcriptional misregulation in cancer                   | $4.71 \times 10^{-14}$ | 75     | 19      |
| Long-term potentiation                                    | $1.32 \times 10^{-13}$ | 33     | 19      |
| MAPK signaling pathway                                    | $3.90 \times 10^{-13}$ | 100    | 19      |
| Endocrine and other factor-regulated calcium reabsorption | $1.28 \times 10^{-12}$ | 23     | 14      |
| Dopaminergic synapse                                      | $1.84 \times 10^{-12}$ | 55     | 19      |
| Glutamatergic synapse                                     | $2.53 \times 10^{-11}$ | 50     | 18      |
| PI3K-Akt signaling pathway                                | $3.96 \times 10^{-11}$ | 120    | 19      |
| Endocytosis                                               | $4.68 \times 10^{-11}$ | 78     | 18      |
| Insulin signaling pathway                                 | $7.77 \times 10^{-11}$ | 55     | 18      |
| Gap junction                                              | $2.00 \times 10^{-10}$ | 37     | 16      |
| Regulation of actin cytoskeleton                          | $2.93 \times 10^{-10}$ | 82     | 19      |
| Neurotrophin signaling pathway                            | $3.76 \times 10^{-10}$ | 50     | 20      |
| Wnt signaling pathway                                     | $9.20 \times 10^{-10}$ | 62     | 19      |
| Focal adhesion                                            | $1.11 \times 10^{-9}$  | 75     | 19      |
| mTOR signaling pathway                                    | $3.46 \times 10^{-9}$  | 29     | 15      |
| Axon guidance                                             | $4.67 \times 10^{-9}$  | 56     | 19      |
| mRNA surveillance pathway                                 | $2.62 \times 10^{-8}$  | 38     | 17      |
| p53 signaling pathway                                     | $2.26 \times 10^{-7}$  | 29     | 18      |
| Melanogenesis                                             | $3.64 \times 10^{-7}$  | 40     | 17      |
| GnRH signaling pathway                                    | $5.03 \times 10^{-7}$  | 36     | 18      |
| TGF-beta signaling pathway                                | $2.71 \times 10^{-6}$  | 35     | 14      |
| Fc gamma R-mediated phagocytosis                          | $4.65 \times 10^{-6}$  | 36     | 18      |

Table S2. Cont.

| KEGG Pathway (Gene Union)                             | <i>p</i> -Value       | #Genes | #miRNAs |
|-------------------------------------------------------|-----------------------|--------|---------|
| Retrograde endocannabinoid signaling                  | $1.14 \times 10^{-5}$ | 44     | 17      |
| Type II diabetes mellitus                             | $1.14 \times 10^{-5}$ | 21     | 13      |
| Prion diseases                                        | $1.61 \times 10^{-5}$ | 10     | 7       |
| Aldosterone-regulated sodium reabsorption             | $1.84 \times 10^{-5}$ | 17     | 12      |
| Dilated cardiomyopathy                                | $2.51 \times 10^{-5}$ | 35     | 14      |
| Endometrial cancer                                    | $4.33 \times 10^{-5}$ | 21     | 12      |
| Cholinergic synapse                                   | $4.51 \times 10^{-5}$ | 45     | 17      |
| Melanoma                                              | $8.49 \times 10^{-5}$ | 28     | 15      |
| Glycosylphosphatidylinositol(GPI)-anchor biosynthesis | 0.0001                | 11     | 10      |
| Protein processing in endoplasmic reticulum           | 0.0001                | 61     | 19      |
| Chronic myeloid leukemia                              | 0.0001                | 28     | 15      |
| RNA transport                                         | 0.0002                | 54     | 20      |
| B cell receptor signaling pathway                     | 0.0003                | 28     | 16      |
| Colorectal cancer                                     | 0.0003                | 25     | 11      |
| Small cell lung cancer                                | 0.0004                | 31     | 14      |
| HTLV-I infection                                      | 0.0004                | 87     | 20      |
| Long-term depression                                  | 0.0005                | 27     | 12      |
| Inositol phosphate metabolism                         | 0.0005                | 25     | 15      |
| Hypertrophic cardiomyopathy (HCM)                     | 0.0006                | 31     | 13      |
| Adherens junction                                     | 0.0006                | 33     | 15      |
| Taurine and hypotaurine metabolism                    | 0.0008                | 5      | 6       |
| Gastric acid secretion                                | 0.0008                | 28     | 15      |
| T cell receptor signaling pathway                     | 0.0008                | 38     | 16      |
| GABAergic synapse                                     | 0.0008                | 39     | 17      |
| Pathways in cancer                                    | 0.0010                | 112    | 19      |
| Nicotine addiction                                    | 0.0014                | 19     | 13      |
| Hepatitis C                                           | 0.0014                | 45     | 17      |
| RNA degradation                                       | 0.0015                | 27     | 17      |
| Glioma                                                | 0.0016                | 29     | 14      |
| Phosphatidylinositol signaling system                 | 0.0030                | 34     | 16      |
| Adipocytokine signaling pathway                       | 0.0033                | 25     | 14      |
| Oocyte meiosis                                        | 0.0033                | 45     | 18      |
| Hepatitis B                                           | 0.0061                | 52     | 20      |
| Vasopressin-regulated water reabsorption              | 0.0061                | 16     | 12      |
| HIF-1 signaling pathway                               | 0.0067                | 37     | 15      |
| Non-small cell lung cancer                            | 0.0079                | 21     | 11      |
| Salivary secretion                                    | 0.0081                | 30     | 17      |
| VEGF signaling pathway                                | 0.0104                | 23     | 17      |
| Osteoclast differentiation                            | 0.0161                | 42     | 17      |
| Jak-STAT signaling pathway                            | 0.0179                | 48     | 19      |
| Basal transcription factors                           | 0.0185                | 16     | 9       |
| Amphetamine addiction                                 | 0.0185                | 29     | 16      |
| Circadian rhythm                                      | 0.0199                | 13     | 10      |
| Maturity onset diabetes of the young                  | 0.0228                | 10     | 6       |
| Pancreatic cancer                                     | 0.0305                | 26     | 14      |
| Acute myeloid leukemia                                | 0.0311                | 19     | 12      |
| Chemokine signaling pathway                           | 0.0337                | 57     | 18      |

The DNA intelligent Analysis (DIANA) miRPath v.2.0, a web-based microRNA-targeted pathway analysis algorithm was used to generate the list.

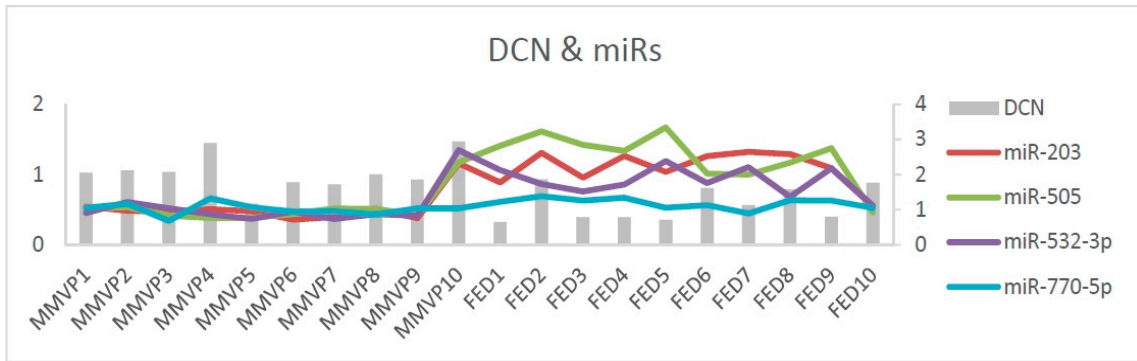

(a)

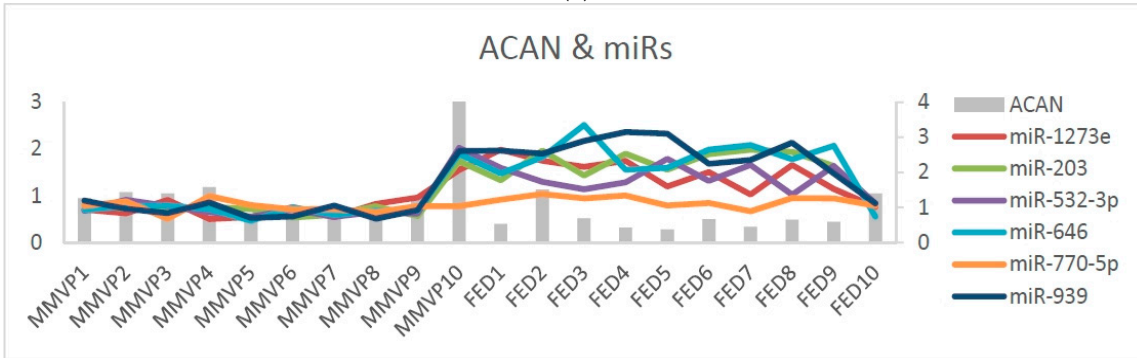

(b)

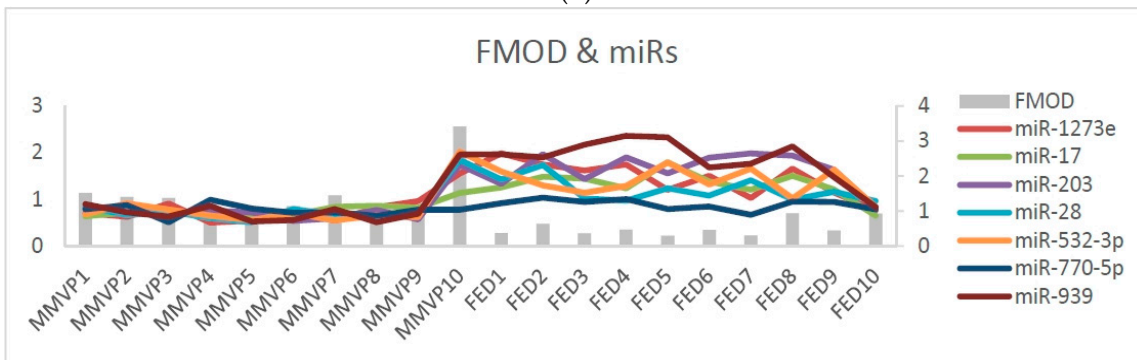

(c)

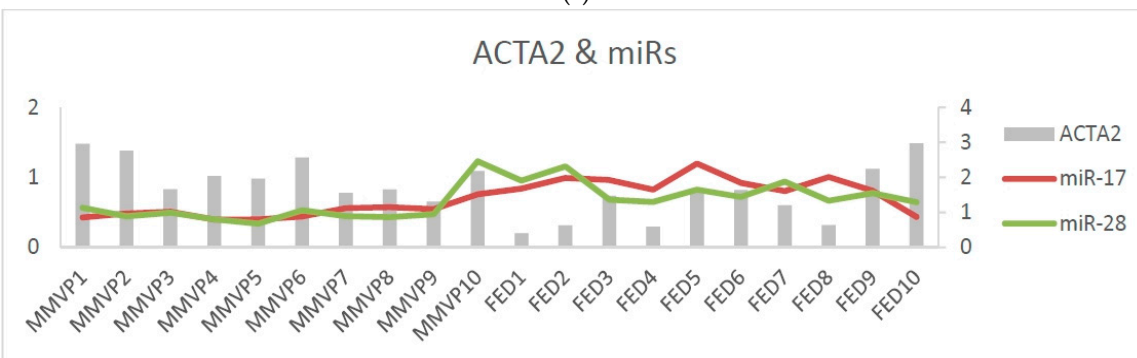

(d)

Figure S2. Cont.

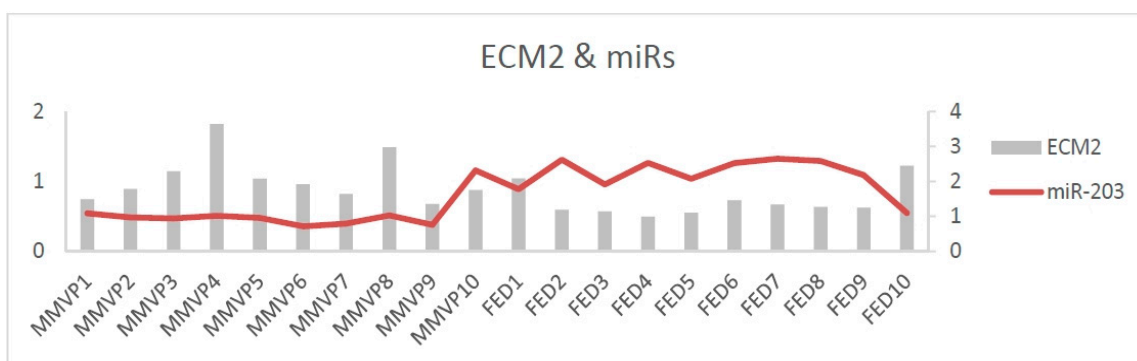

(e)

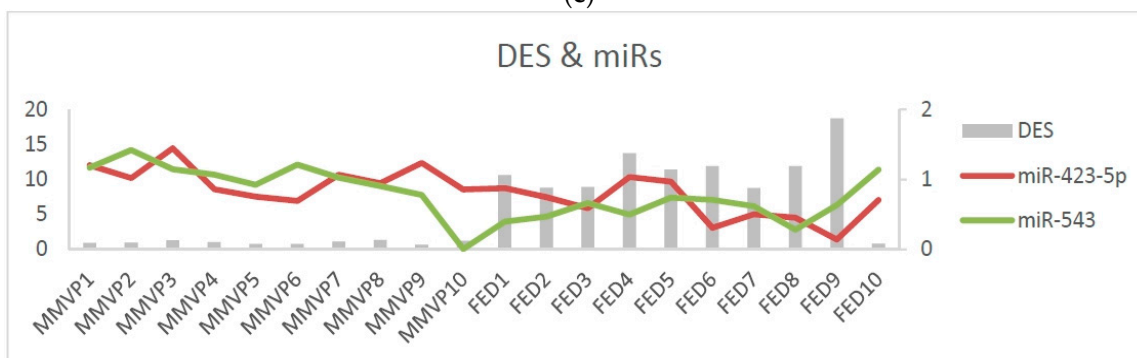

(f)

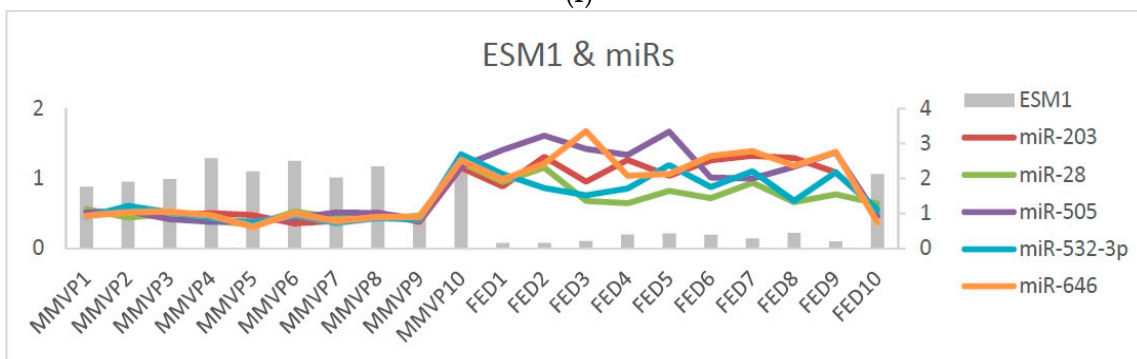

(g)

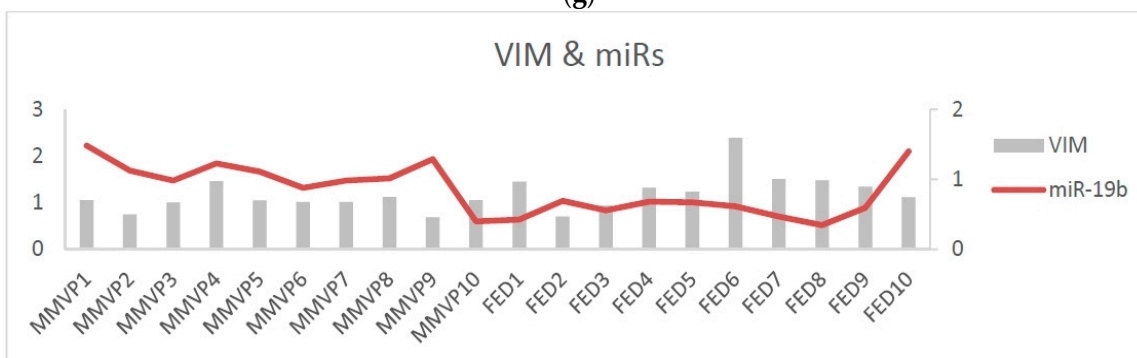

(h)

**Figure S2.** Relative expression patterns between microRNAs and putative target genes of individual patients. Data presented are means of gene expression levels relative to the average values of MMVP samples. Primary axis (**left**) indicate the relative expression levels of the predicted target genes (gray columns); whereas, secondary axis (**right**) indicate the relative expression levels of microRNAs (colored lines). (a) DCN; (b) ACAN; (c) FMOD; (d) ACTA2; (e) ECM2; (f) DES; (g) ESM1; (h) VIM.
